# Supplementary material for: Integrative analysis of lung molecular signatures reveals key drivers of idiopathic pulmonary fibrosis
Source: Springer Nature journal article supplement (doi:10.1186/s12890-021-01749-3), 2021-12-07
Supplement: MOESM1 [file 19938392]

**Integrative analysis of lung molecular signatures reveals key drivers of idiopathic  
pulmonary fibrosis**

Sung Kyoung Kim<sup>1\*</sup>, Seung Min Jung<sup>2\*</sup>, Kyung-Su Park<sup>2</sup>, Ki-Jo Kim<sup>2</sup>

<sup>1</sup> Division of Pulmonology, Department of Internal Medicine, St. Vincent's Hospital, College of Medicine, The Catholic University of Korea, Seoul, Republic of Korea

<sup>2</sup> Division of Rheumatology, Department of Internal Medicine, St. Vincent's Hospital, College of Medicine, The Catholic University of Korea, Seoul, Republic of Korea

\* Both authors contributed equally to this work.

## Supplementary Table

**Table S1.**

(A) A summary of the datasets used in the study

| Dataset   | Reference                                                           | Country | Platform   | IPF | NC  | Lung tissue sampling                                                | Source |
|-----------|---------------------------------------------------------------------|---------|------------|-----|-----|---------------------------------------------------------------------|--------|
| GSE10667  | <i>Am J Respir Crit Care Med.</i> 2009;180:167-175. <sup>1</sup>    | USA     | Affymetrix | 31  | 15  | Explanted lung biopsy or warm autopsy                               |        |
| GSE21369  | <i>BMC Med Genomics.</i> 2011;4:8. <sup>2</sup>                     | USA     | Illumina   | 11  | 6   | Surgical lung biopsy or lungs explanted during lung transplantation | LTRC   |
| GSE24206  | <i>BMC Med Genomics.</i> 2011;4:70. <sup>3</sup>                    | USA     | Agilent    | 17  | 6   | Surgical lung biopsy or lungs explanted during lung transplantation |        |
| GSE32537  | <i>Thorax.</i> 2013;68:1114-1121. <sup>4</sup>                      | USA     | Agilent    | 119 | 50  | Surgical lung biopsy or lungs explanted during lung transplantation | LTRC   |
| GSE35145  | <i>Am J Respir Crit Care Med.</i> 2012;186:525-535. <sup>5</sup>    | USA     | Agilent    | 4   | 4   | Surgical lung biopsy or lungs explanted during lung transplantation | LTRC   |
| GSE47460  | <i>Am J Respir Crit Care Med.</i> 2016;194:1392-1402. <sup>6</sup>  | USA     | Affymetrix | 160 | 108 | Surgical lung biopsy or lungs explanted during lung transplantation | LTRC   |
| GSE53845  | <i>Thorax.</i> 2015;70:48-56. <sup>7</sup>                          | USA     | Illumina   | 40  | 8   | Surgical lung biopsy or lungs explanted during lung transplantation |        |
| GSE72073  | <i>Respir Res.</i> 2015;16:124. <sup>8</sup>                        | China   | Illumina   | 5   | 3   | Surgical lung biopsy                                                |        |
| GSE83717  | <i>BMC Pulm Med.</i> 2017;17:15. <sup>9</sup>                       | USA     | Affymetrix | 6   | 5   | Surgical lung biopsy or lungs explanted during lung transplantation | LTRC   |
| GSE99621  | <i>Clin Immunol.</i> 2018;325:1-13. <sup>10</sup>                   | USA     | Illumina   | 18  | 8   | Lungs explanted during lung transplantation                         |        |
| GSE110147 | <i>Respir Res.</i> 2018;19:153. <sup>11</sup>                       | Canada  | Affymetrix | 22  | 11  | Lungs explanted during lung transplantation                         |        |
| GSE124685 | <i>JCI Insignt.</i> 2019;4:e131597. <sup>12</sup>                   | USA     | IonTorrent | 49  | 35  | Lungs explanted during lung transplantation                         | LTRC   |
| GSE150910 | <i>Am J Respir Crit Care Med.</i> 2020;202:1430-1444. <sup>13</sup> | USA     | Illumina   | 103 | 103 | Surgical lung biopsy or lungs explanted during lung transplantation | LTRC   |
| Total     |                                                                     |         |            | 585 | 362 |                                                                     |        |

IPF, idiopathic pulmonary fibrosis; LTRC, Lung Tissue Research Consortium; NC, normal controls.

(B) A demographic summary of the patients with IPF used in the study

| Dataset   | Number of IPF samples | Sex Male (%) | Age (mean) | Smoking (%) | Race                                                                    | FVC% (mean) | DLCO% (mean) |
|-----------|-----------------------|--------------|------------|-------------|-------------------------------------------------------------------------|-------------|--------------|
| GSE10667  | 31                    | 22 (70.9)    | 68.1       | 20 (64.5)   | Caucasian 31                                                            | 68.6        | 48.3         |
| GSE21369  | 11                    | 8 (72.7)     | 58.1       | NA          | Caucasian 10<br>African-American 1                                      | 62.7        | NA           |
| GSE24206  | 17                    | 12 (70.6)    | 64.2       | NA          | NA                                                                      | 60.7        | 44.3         |
| GSE32537  | 119                   | 77 (64.7)    | 62.6       | 70 (58.8)   | Caucasian 111<br>Other 8                                                | 61.2        | 45.1         |
| GSE35145  | 4                     | 3 (75.0)     | 60.3       | NA          | Caucasian 4                                                             | NA          | NA           |
| GSE47460  | 160                   | 110 (68.8)   | 64.1       | 99 (61.9)   | Caucasian 146<br>African-American 8<br>Asian 3<br>Hispanic 2<br>Other 1 | 64.3        | 48.0         |
| GSE53845  | 40                    | 32 (80)      | 70         | 29 (72.5)   | NA                                                                      | 70.3        | 49.6         |
| GSE72073  | 5                     | 5 (100)      | 51.1       | NA          | NA                                                                      | NA          | NA           |
| GSE83717  | 6                     | NA           | NA         | NA          | NA                                                                      | NA          | NA           |
| GSE99621  | 18                    | 18           | 71.1       | 4           | Caucasian 18                                                            | 44.8        | 35.5         |
| GSE110147 | 22                    | 17 (77.3)    | 62         | NA          | NA                                                                      | 57          | 37           |
| GSE124685 | 49                    | 49           | 57         | 49          | NA                                                                      | 58.7        | 27.6         |
| GSE150910 | 103                   | 57 (55.3)    | 60.3       | 55 (53.4)   | Caucasian 85<br>Hispanic 7<br>Asian 2<br>African-American 4<br>Other 4  | 56.2        | 40.8         |

DLCO, Diffusing capacity of the Lung for carbon monoxide; FVC, forced vital capacity; IPF, idiopathic pulmonary fibrosis; NA, not available

(C) A demographic summary of the normal subjects used in the study

|                     | <b>GSE32537</b> | <b>GSE47460</b> | <b>GSE150910</b> | <b>Others</b> |
|---------------------|-----------------|-----------------|------------------|---------------|
| Number              | 50              | 108             | 103              | 101           |
| Age, mean (year)    | 47.5            | 63.6            | 59.9             |               |
| Sex, male (%)       | 27 (54)         | 49 (45)         | 45 (44)          |               |
| Race, Caucasian (%) | 41 (82)         | 100 (92)        | NA               |               |
| Smoking (%)         | 28 (56)         | 65 (59.9)       | 53 (55)          |               |
| FVC%, mean          | NA              | 94.4            | 72.0             |               |
| DLCO%, mean         | NA              | 84.1            | 97.7             |               |

## References

- 1 Konishi K, Gibson KF, Lindell KO, *et al.* Gene expression profiles of acute exacerbations of idiopathic pulmonary fibrosis. *Am J Respir Crit Care Med* 2009;180:167-75.
- 2 Cho JH, Gelinas R, Wang K, *et al.* Systems biology of interstitial lung diseases: integration of mRNA and microRNA expression changes. *BMC Med Genomics* 2011;4:8.
- 3 Meltzer EB, Barry WT, D'Amico TA, *et al.* Bayesian probit regression model for the diagnosis of pulmonary fibrosis: proof-of-principle. *BMC Med Genomics* 2011;4:70.
- 4 Yang IV, Coldren CD, Leach SM, *et al.* Expression of cilium-associated genes defines novel molecular subtypes of idiopathic pulmonary fibrosis. *Thorax* 2013;68:1114-21.
- 5 Sanders YY, Ambalavanan N, Halloran B, *et al.* Altered DNA methylation profile in idiopathic pulmonary fibrosis. *Am J Respir Crit Care Med* 2012;186:525-35.
- 6 Tan J, Tedrow JR, Dutta JA, *et al.* Expression of RXFP1 Is Decreased in Idiopathic Pulmonary Fibrosis. Implications for Relaxin-based Therapies. *Am J Respir Crit Care Med* 2016;194:1392-402.
- 7 DePianto DJ, Chandriani S, Abbas AR, *et al.* Heterogeneous gene expression signatures correspond to distinct lung pathologies and biomarkers of disease severity in idiopathic pulmonary fibrosis. *Thorax* 2015;70:48-56.
- 8 Geng J, Huang X, Li Y, *et al.* Down-regulation of USP13 mediates phenotype transformation of fibroblasts in idiopathic pulmonary fibrosis. *Respir Res* 2015;16:124.
- 9 Vukmirovic M, Herazo-Maya JD, Blackmon J, *et al.* Identification and validation of differentially expressed transcripts by RNA-sequencing of formalin-fixed, paraffin-embedded (FFPE) lung tissue from patients with Idiopathic Pulmonary Fibrosis. *BMC Pulm Med* 2017;17:15.
- 10 Luzina IG, Salcedo MV, Rojas-Peña ML, *et al.* Transcriptomic evidence of immune activation in macroscopically normal-appearing and scarred lung tissues in idiopathic pulmonary fibrosis. *Cell Immunol* 2018;325:1-13.
- 11 Cecchini MJ, Hosein K, Howlett CJ, *et al.* Comprehensive gene expression profiling identifies distinct and overlapping transcriptional profiles in non-specific interstitial pneumonia and idiopathic pulmonary fibrosis. *Respir Res* 2018;19:153.
- 12 McDonough JE, Ahangari F, Li Q, *et al.* Transcriptional regulatory model of fibrosis

progression in the human lung. *JCI Insight* 2019;4.

- 13 Furusawa H, Cardwell JH, Okamoto T, *et al.* Chronic Hypersensitivity Pneumonitis, an Interstitial Lung Disease with Distinct Molecular Signatures. *Am J Respir Crit Care Med* 2020;202:1430-44.
